# Supplementary material
Source: publisher figshare collection journal article supplement (https://acs.figshare.com/ndownloader/files/5753178)

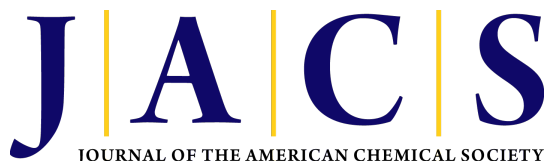

JOURNAL OF THE AMERICAN CHEMICAL SOCIETY

J. Am. Chem. Soc., 1997, 119(9), 2323-2324, DOI: [10.1021/ja963561s](https://doi.org/10.1021/ja963561s)

#### Terms & Conditions

Electronic Supporting Information files are available without a subscription to ACS Web Editions. The American Chemical Society holds a copyright ownership interest in any copyrightable Supporting Information. Files available from the ACS website may be downloaded for personal use only. Users are not otherwise permitted to reproduce, republish, redistribute, or sell any Supporting Information from the ACS website, either in whole or in part, in either machine-readable form or any other form without permission from the American Chemical Society. For permission to reproduce, republish and redistribute this material, requesters must process their own requests via the RightsLink permission system. Information about how to use the RightsLink permission system can be found at <http://pubs.acs.org/page/copyright/permissions.html>

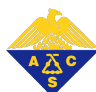

ACS Publications

MOST TRUSTED. MOST CITED. MOST READ.

Copyright © 1997 American Chemical Society

Supplementary Material for  
*Design of a Unique Protein Scaffold for Maquettes*  
 by Brian R. Gibney, Francesc Rabanal, Jack J. Skalicky,  
 A. Joshua Wand and P. Leslie Dutton

Figure S1 One-dimensional NMR spectra in the aromatic-amide proton region of (A) H10H24, (B) H10H24-L13F, (C) H10H24-L6I and (D) H10H24-L6I,L13F. Spectra were acquired using identical acquisition and processing parameters.

Figure S2  $^1\text{H}$ - $^1\text{H}$  NOESY NMR spectra in the aromatic-amide proton region of the double variant H10H24-L6I,L13F. Solution conditions were as follows: 1.0 mM protein in 20 mM phosphate buffer [pH 7.20], 50 mM KCl, 8% D<sub>2</sub>O and 32°C.

Figure S3 Heme binding titration for H10H24-L6I,L13F. Spectra were acquired on a Perkin-Elmer 2D Spectrophotometer at 25°C in 10mM potassium phosphate, 100mM KCl, pH 8.1 buffer. Peptide concentration was 4  $\mu\text{M}$  as determined spectrophotometrically using Trp ( $\epsilon_{280} = 5600 \text{ M}^{-1} \text{ cm}^{-1} \text{ helix}^{-1}$ ).

Figure S4 Electron paramagnetic resonance spectrum of holo-H10H24-L6I,L13F. EPR spectroscopy was performed using a Bruker ESP300E spectrometer operating at X-band frequencies. EPR parameters: sample temperature, 20K; microwave frequency 9.455 GHz; microwave power, 10 mW; modulation frequency, 100 kHz; modulation amplitude, 20 G; receiver gain,  $2 \times 10^4$ ; time constant, 164 ms; scans, 1.

Figure S1

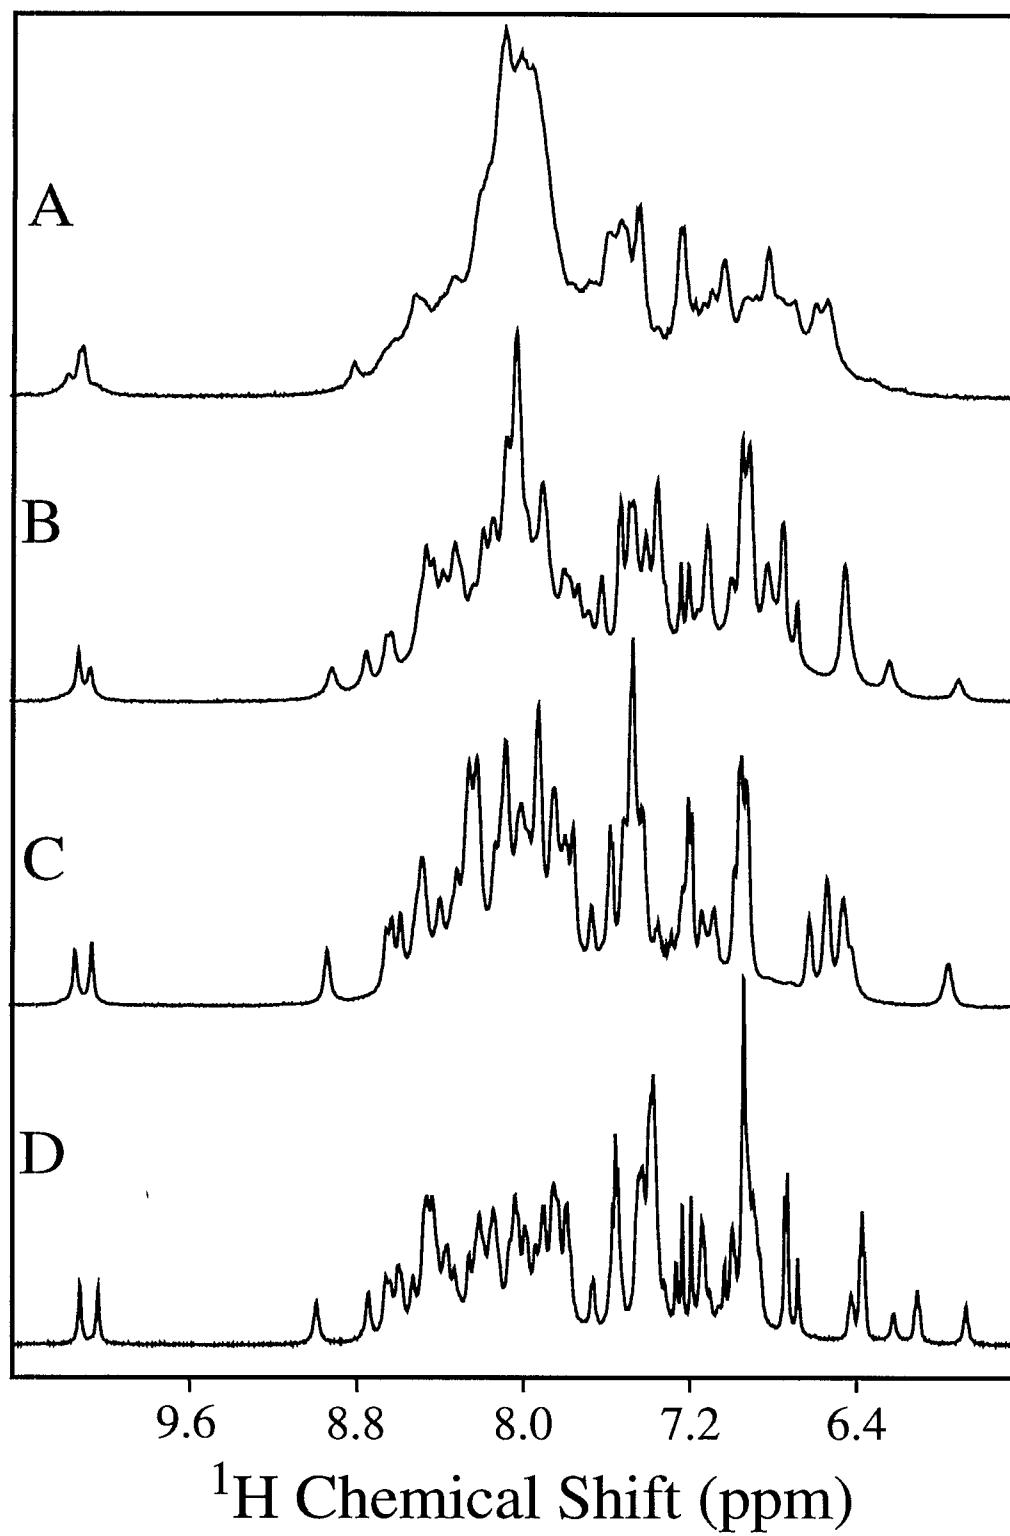

Figure S2

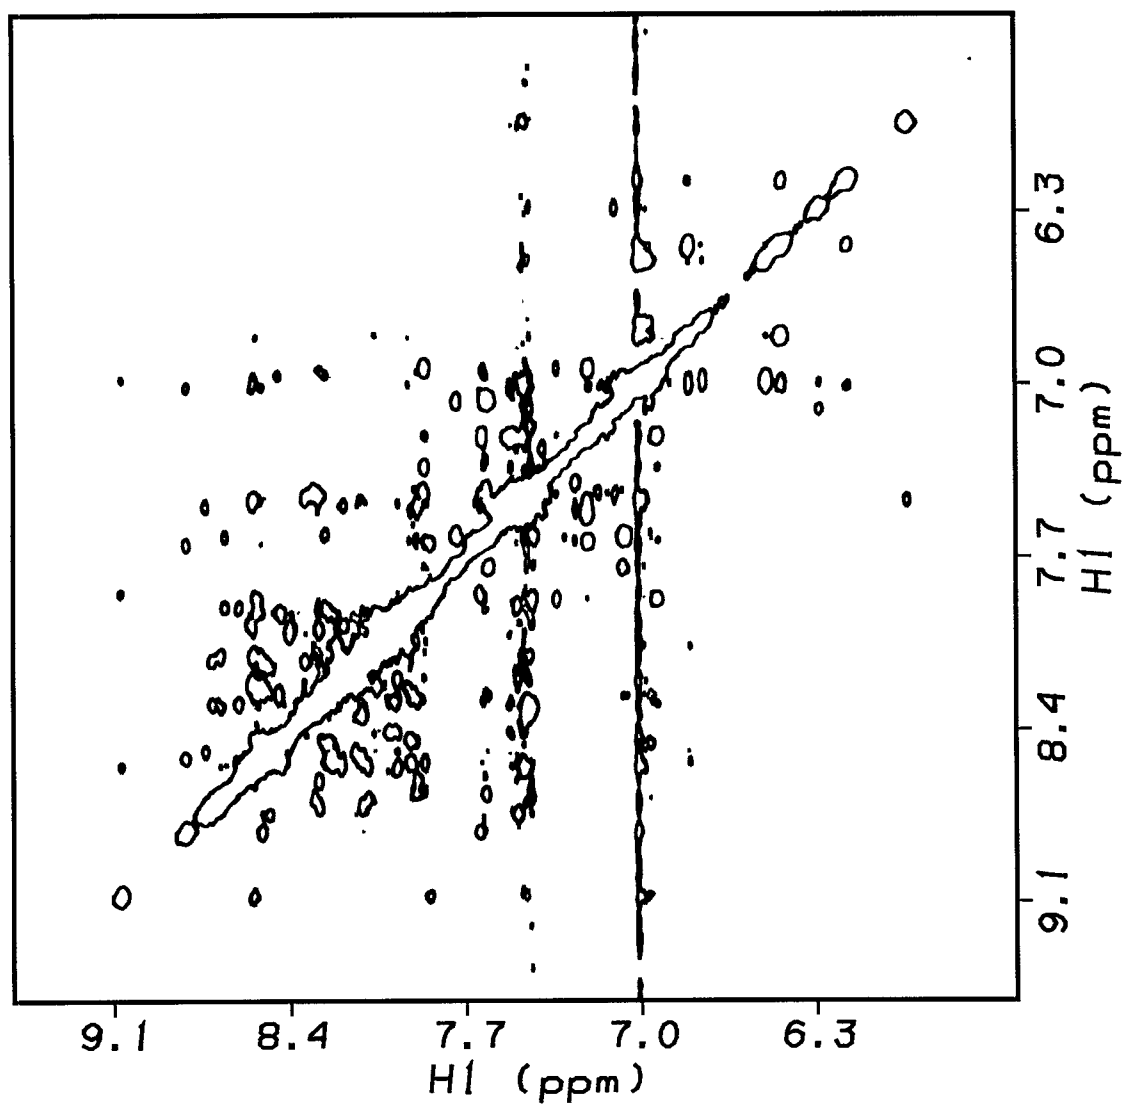

Figure S3

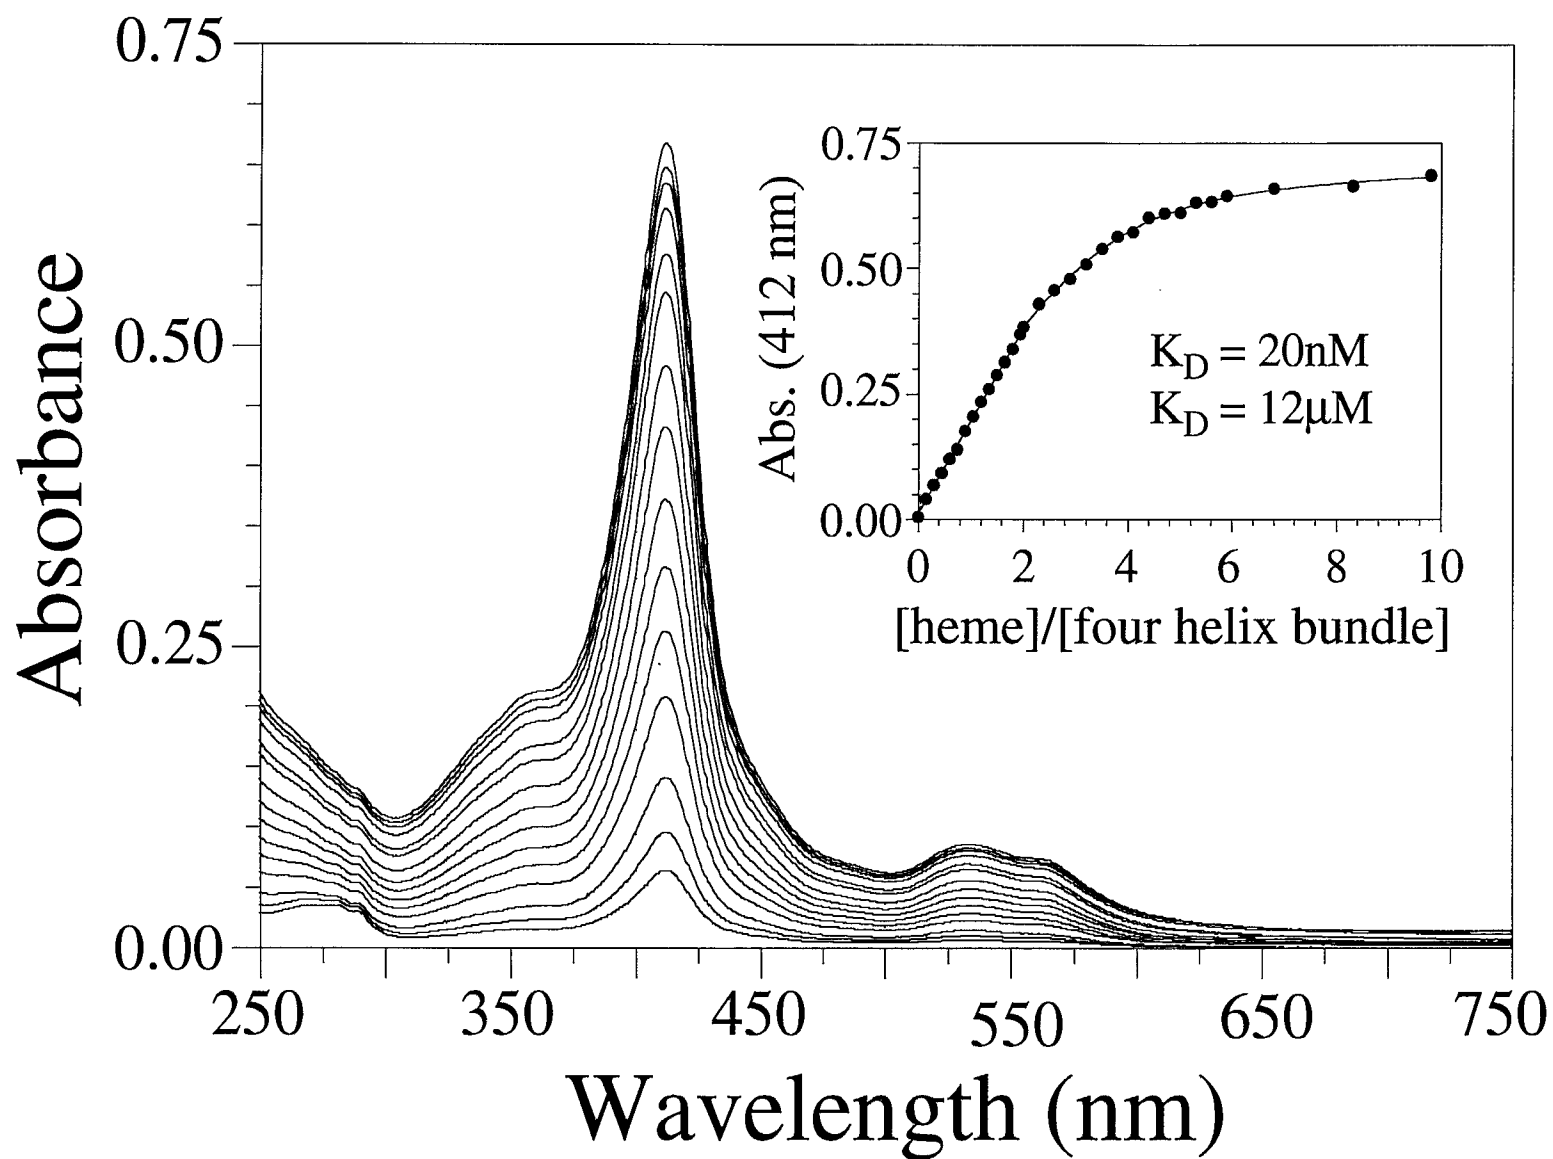

Figure S4

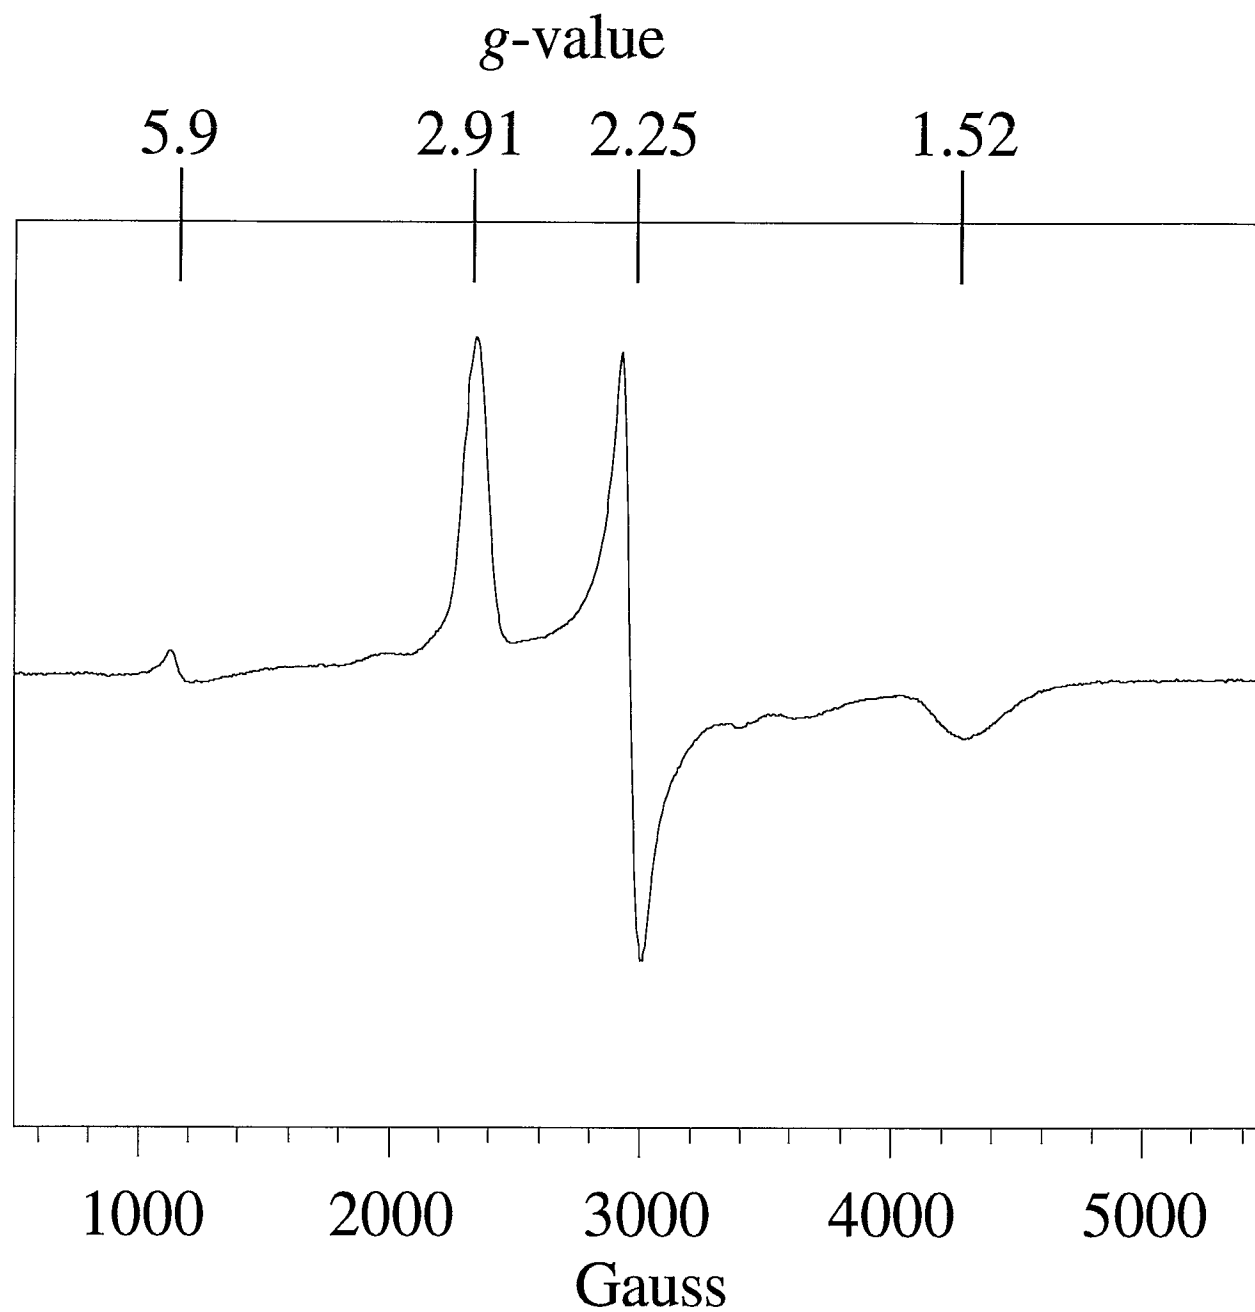

Supplement: Supplementary file 1 [file 5753178]
